# Supplementary material for: Polymorphism analyses and protein modelling inform on functional specialization of Piwi clade genes in the arboviral vector Aedes albopictus
Source: PLOS journal article supplement (doi:10.1371/journal.pntd.0007919), 2019-12-02
Supplement: S1 (10.1371/journal.pntd.0007919.s001) [file journal.pntd.0007919.s001]

**S1 Table.** List of the core components of the piRNA pathway in *Ae. aegypti* and their orthologous in *Ae. albopictus*.

|                | <i>Aedes aegypti</i> | <i>Aedes albopictus</i>                     |
|----------------|----------------------|---------------------------------------------|
| Gene           | Gene ID <sup>1</sup> | Gene ID <sup>2</sup>                        |
| <i>Ago3</i>    | AAEL007823           | AALF025916/ AALF025919 <sup>4</sup>         |
| <i>Piwi1/3</i> | AAEL013692           | AALF005499 <sup>5</sup>                     |
| <i>Piwi2</i>   | AAEL008098           | AALF006708 <sup>6</sup>                     |
| <i>Piwi4</i>   | AAEL007698           | AALF006337/ AALF008582 <sup>7</sup>         |
| <i>Piwi5</i>   | AAEL013233           | XM_019686836.1/ XM_019692765.1 <sup>8</sup> |
| <i>Piwi6</i>   | AAEL013227           | AALF016369                                  |
| <i>Piwi7</i>   | AAEL006287           | AALF015479/AALF007445 <sup>9</sup>          |

<sup>1</sup>Gene ID is based on AaegL5

<sup>2</sup>Gene ID is based on AaLoF1 for *Ago3*, *Piwi1/3*, *Piwi2*, *Piwi4*, *Piwi6* and *PIWI7*; on canu\_80X\_arrow2.2 for *Piwi5*.

<sup>4</sup>In AaLoF1, two genes, AALF025916 and AALF025919, which differ uniquely in the length of their annotated 5'UTR regions, are identified.

<sup>5</sup>Two genes, AALF005499 and AALF005498, are annotated in AaLoF1; sequencing of exon-intron boundaries and cDNA confirmed the gene structure of AALF005499.

<sup>6</sup>Two genes, AALF006534 and AALF006708, are identified in AaLoF1. The only notable difference between the two genes is a tandem duplication of 98bp in AALF006534, which generates a sixth exons. Sequencing of exon-intron boundaries and cDNAs from different mosquitoes confirmed the gene structure of AALF006708.

<sup>7</sup>In AaLoF1, two genes, AALF06337 and AALF008582, which differ uniquely in the length of their 3'UTR regions, are annotated.

<sup>8</sup>No sequence orthologous to AAEL013233 was retrieved in AaLoF1, but three sequences were identified in the genome of C6/36 cells. XM\_019692797.1.

<sup>9</sup>Two genes, AALF015479 and AALF007445, are identified in AaLoF1, with a >96% sequence similarity, suggesting they are alternative alleles of the same gene.
